# Supplementary material
Source: publisher site journal article supplement (https://www.dovepress.com/article/supplementary_file/600126/600126%20Supplementary%20Material.docx)
Supplement: Supplementary file 1 [file 600126%20Supplementary%20Material.docx]

**Supplementary Table 1.** Knowledge distribution.

| **Knowledge, n (%)** | **Understand** | **Partially Understand** | **Unclear** |
| --- | --- | --- | --- |
| 1. Do you understand that for women, postmenopausal osteoporosis is mainly caused by a reduction in estrogen synthesized by the ovaries after menopause? | 115 (24.68) | 174 (37.34) | 177 (37.98) |
| 2. Do you understand that postmenopausal women are at a higher risk of developing osteoporosis? | 144 (30.90) | 158 (33.91) | 164 (35.19) |
| 3. Do you understand that osteoporosis is a significant cause of bone fractures in the elderly? | 230 (49.36) | 161 (34.55) | 75 (16.09) |
| 4. Do you understand that individuals with a family history of osteoporosis are more prone to developing the condition? | 112 (24.03) | 127 (27.25) | 227 (48.71) |
| 5. Do you understand that excessive alcohol consumption can increase the risk of osteoporosis? | 106 (22.75) | 115 (24.68) | 245 (52.58) |
| 6. Do you understand that smoking may lead to osteoporosis? | 93 (19.96) | 100 (21.50) | 273 (58.58) |
| 7. Do you understand that regular outdoor sunlight exposure can help prevent osteoporosis? | 290 (62.23) | 131 (28.11) | 45 (9.66) |
| 8. Do you understand that supplementing calcium and vitamin D can help prevent osteoporosis? | 263 (56.44) | 157 (33.69) | 46 (9.87) |
| 9. Do you understand that moderate exercise can help prevent osteoporosis? | 250 (53.65) | 154 (33.05) | 62 (13.30) |
| 10. Do you understand that bone density testing can be used to diagnose osteoporosis? | 234 (50.21) | 125 (26.82) | 107 (22.96) |
| 11. Do you understand that women within 10 years of menopause can use estrogen therapy to prevent postmenopausal osteoporosis? | 62 (13.30) | 110 (23.61) | 294 (63.09) |
| 12. Do you understand the adverse effects associated with estrogen therapy? | 62 (13.30) | 99 (21.24) | 305 (65.45) |
| 13. Do you understand the common sites where osteoporotic fractures occur? | 68 (14.59) | 165 (35.41) | 233 (50.00) |
| 14. Do you understand that the risk of experiencing a subsequent fracture at the same site increases after an osteoporotic fracture? | 116 (24.89) | 141 (30.26) | 209 (44.85) |
| 15. Do you understand that experiencing an osteoporotic fracture can increase the risk of worsening osteoporosis? | 98 (21.03) | 157 (33.69) | 211 (45.28) |

**Supplementary Table 2.** Attitude Distribution.

| **Attitude, n (%)** | **Strongly Agree** | **Agree** | **Neutral** | **Disagree** | **Strongly Disagree** |
| --- | --- | --- | --- | --- | --- |
| 1. I am very concerned about the possibility of developing postmenopausal osteoporosis and osteoporotic fractures. | 120 (25.75) | 237 (50.86) | 79 (16.95) | 29 (6.22) | 1 (0.21) |
| 2. I believe that after the age of 40, regardless of menopausal status, regular bone density checks should be performed. | 76 (16.31) | 258 (55.36) | 119 (25.54) | 11 (2.36) | 2 (0.43) |
| 3. I believe that postmenopausal osteoporosis will not threaten my life. | 18 (3.86) | 181 (38.84) | 67 (14.38) | 188 (40.34) | 12 (2.58) |
| 4. I believe that having other chronic conditions (such as diabetes, rheumatoid arthritis, etc.) can lead to or worsen osteoporosis. | 51 (10.94) | 312 (66.95) | 71 (15.24) | 30 (6.44) | 2 (0.43) |
| 5. I believe that postmenopausal osteoporosis is preventable and treatable. | 64 (13.73) | 351 (75.32) | 35 (7.51) | 15 (3.22) | 1 (0.21) |
| 6. I believe that one should not wait until a fracture occurs to check for osteoporosis. | 64 (13.73) | 282 (60.52) | 48 (10.30) | 63 (13.52) | 9 (1.93) |
| 7. I believe it is important to proactively educate oneself about postmenopausal osteoporosis. | 93 (19.96) | 300 (64.38) | 69 (14.81) | 3 (0.64) | 1 (0.21) |

**Supplementary Table 3.** Practice distribution.

| **Practice** | **N (%)** | | | | |
| --- | --- | --- | --- | --- | --- |
|  | **Never** | **1-2 days/week** | **3-4 days/week** | **5-6 days/week** | **Everyday** |
| 1. How often do you drink milk per week? | 81 (17.38) | 144 (30.90) | 88 (18.88) | 44 (9.44) | 109 (23.39) |
| 2. How often do you consume strong tea or coffee per week? | 263 (56.44) | 93 (19.96) | 32 (6.87) | 20 (4.29) | 58 (12.45) |
| 4. How often do you exercise per week? | 63 (13.52) | 95 (20.39) | 136 (29.18) | 59 (12.66) | 113 (24.25) |
| 6. How often do you sunbathe per week? | 65 (13.95) | 166 (35.62) | 104 (22.32) | 35 (7.51) | 96 (20.60) |
| 8. How often do you take vitamin D per week? | 317 (68.03) | 63 (13.52) | 32 (6.87) | 13 (2.79) | 41 (8.80) |
| 9. How often do you take calcium supplements per week? | 236 (50.64) | 102 (21.89) | 45 (9.66) | 21 (4.51) | 62 (13.30) |
|  | **Never** | **<30 minutes** | **30 minutes-1 hour** | **>1 hour** |  |
| 5. How long do you exercise each time? | 63 (13.52) | 101 (21.67) | 225 (48.28) | 77 (16.53) |  |
| 7. How long do you sunbathe each time? | 65 (13.95) | 296 (63.52) | 72 (15.45) | 33 (7.08) |  |
|  | **Aerobic exercise (running, brisk walking, dancing, cycling, tai chi, household chores, etc.)** | **Strength training (dumbbells, barbells, weighted squats, strength training for various muscle groups, etc.)** | **Balance exercise (walking from heel to toe, stepping in a straight line, balancing a book on your head, etc.)** |  |  |
| 3. What is your most common type of exercise? | 381 (81.76) | 6 (1.29) | 33 (7.08) |  |  |
|  | **Healthcare professionals** | **Television, newspapers, and other media** | **Newspapers and magazines** | **Internet and social media** | **Professional books** |
| 10. Where do you prefer to get information about osteoporosis? | 304 (65.24) | 178 (38.20) | 83 (17.81) | 210 (45.06) | 123 (26.39) |

**Supplementary Table 4.** Correlation analysis

|  | Knowledge | Attitude | Practice |
| --- | --- | --- | --- |
| Knowledge | 1 |  |  |
| Attitude | 0.185 (P<0.001) | 1 |  |
| Practice | -0.209 (P<0.001) | 0.002 (P=0.963) | 1 |

**Supplementary Table 5.** Model fit of SEM model

| **Fit Indicates** | **Ref.** | **Measured results** |
| --- | --- | --- |
| **CMIN/DF** | 1-3 excellent，3-5 good | 2.802 |
| **RMSEA** | <0.08 good | 0.062 |
| **IFI** | >0.8 good | 0.890 |
| **TLI** | >0.8 good | 0.876 |
| **CFI** | >0.8 good | 0.889 |
